1 **SARS-CoV-2-specific memory B cells can persist in the elderly despite loss of neutralising**  
2 **antibodies**

3

4

5 Anna Jeffery-Smith,<sup>1,2,3</sup> Alice R Burton,<sup>1</sup> Sabela Lens,<sup>1</sup> Chloe Rees-Spear,<sup>1</sup> Monika Patel,<sup>2</sup> Robin  
6 Gopal,<sup>2</sup> Luke Muir,<sup>1</sup> Felicity Aiano,<sup>4</sup> Katie J Doores,<sup>5</sup> J. Yimmy Chow,<sup>6</sup> Shamez N Ladhani,<sup>4</sup>  
7 Maria Zambon,<sup>2\*</sup> Laura E McCoy,<sup>1\*</sup> Mala K Maini.<sup>1\*</sup>

8

9 <sup>1</sup>Division of Infection and Immunity, Institute of Immunity and Transplantation, University  
10 College London, United Kingdom

11 <sup>2</sup>Virus Reference Department, Public Health England, United Kingdom

12 <sup>3</sup>Blizard Institute, Queen Mary University of London, United Kingdom

13 <sup>4</sup>Immunisation and Countermeasures Division, Public Health England, United Kingdom

14 <sup>5</sup>Department of Infectious Diseases, School of Immunology & Microbial Sciences, King's  
15 College London, London, UK

16 <sup>6</sup>London Coronavirus Response Cell, Public Health England, United Kingdom

17

18 \*Joint senior authors

19 Corresponding author: Mala K Maini [m.maini@ucl.ac.uk](mailto:m.maini@ucl.ac.uk) ORCID: 0000-0001-6384-1462

20

21

22

23

## 24 Abstract

25 Memory B cells (MBC) can provide a recall response able to supplement waning antibodies  
26 with an affinity-matured response better able to neutralise variant viruses. We studied a  
27 cohort of vulnerable elderly care home residents and younger staff, a high proportion of  
28 whom had lost neutralising antibodies (nAb), to investigate their reserve immunity from  
29 SARS-CoV-2-specific MBC. Class-switched spike and RBD-tetramer-binding MBC with a  
30 classical phenotype persisted five months post-mild/asymptomatic SARS-CoV-2 infection,  
31 irrespective of age. Spike/RBD-specific MBC remained detectable in the majority who had lost  
32 nAb, although at lower frequencies and with a reduced IgG/IgA isotype ratio. Functional  
33 spike/S1/RBD-specific recall was also detectable by ELISpot in some who had lost nAb, but  
34 was significantly impaired in the elderly, particularly to RBD. Our findings demonstrate  
35 persistence of SARS-CoV-2-specific MBC beyond loss of nAb, but highlight the need for careful  
36 monitoring of functional defects in RBD-specific B cell immunity in the elderly.

37

38

39 **One sentence summary:** Circulating class-switched spike and RBD-specific memory B cells can  
40 outlast detectable neutralising antibodies but are functionally constrained in the elderly.

41

42

43

## 44 Introduction

45 The human coronavirus SARS-CoV-2 has had a particularly devastating impact on the elderly,  
46 who are at much greater risk of morbidity and mortality.<sup>1,2</sup> Understanding the nature of a  
47 successful immune response in those who have avoided these outcomes and cleared SARS-  
48 CoV-2 after a mild infection, despite advanced age, is key to protecting this vulnerable group  
49 in the future. Whether older survivors of SARS-CoV-2 infection are able to mount robust and  
50 durable responses with the potential to provide long-term protection from reinfection, and  
51 from emerging viral variants, remains to be understood. Insights into the strengths and  
52 limitations of the immune response in those who have had a successful outcome of natural  
53 infection can inform the future optimisation of vaccines. It is also crucial to understand the  
54 nature of the immune protection afforded to previously infected individuals whilst they await  
55 vaccination, especially with the ongoing delays in rollout and the lag in provision to low and  
56 middle-income countries.

57

58 Antibodies, in particular the neutralising fraction, provide a vital frontline defence to achieve  
59 protective immunity against viruses. An initial waning of antibody titres is typically seen after  
60 resolution of an acute viral infection.<sup>3,4</sup> In the case of some viruses, long-lived plasma cells are  
61 then able to maintain antibodies for decades.<sup>5-7</sup> By contrast, in the months following infection  
62 with other viruses, including human coronaviruses like SARS-CoV-2, neutralising antibodies  
63 continue to wane and can drop below the threshold of detection in a proportion of  
64 individuals.<sup>3,8-13</sup> Even if antibodies are maintained, they may fail to provide sufficient  
65 functional flexibility to cross-recognise viral variants.<sup>14-16</sup> However, antibody responses of  
66 inadequate titre or unable to cross-recognise variants can be compensated by a second line  
67 of defence provided by antigen-specific memory B cells (MBC), that are poised to react rapidly  
68 upon pathogen re-encounter.<sup>17-19</sup> Not only can MBC provide a faster response on re-exposure  
69 to the virus, they are also able to diversify in the face of a mutating virus, resulting in more  
70 potent, affinity-matured antibody response and enhanced resistance to viral mutations.<sup>9,20</sup>

71

72 In this study, we therefore analysed whether MBC develop in elderly subjects following the  
73 resolution of SARS-CoV-2 infection and whether they can maintain functionality once  
74 neutralising antibodies (nAb) have waned. To address these questions, we studied elderly

75 residents that had recovered from SARS-CoV-2 infection following outbreaks in three care  
76 homes in the UK, who had mild or asymptomatic infection, a substantial proportion of whom  
77 lost detectable nAb by five months after outbreak resolution. MBC were compared between  
78 the elderly care home residents and younger staff to assess the impact of ageing. We  
79 identified MBC specific for SARS-CoV-2 spike and RBD that persisted when serum nAb had  
80 completely waned. Their frequency, phenotype, isotype and function were analysed  
81 according to age and/or nAb loss, to inform the assessment and boosting of durable immunity  
82 in the elderly.

83

## 84 Results

### 85 *SARS-CoV2 spike and RBD-specific memory B cells can persist after loss of neutralising* 86 *antibodies*

87 To study the role of MBC, we obtained PBMC from a subset (n=32) of a large cohort who  
88 survived COVID-19 with mild/asymptomatic infection after outbreaks in three care homes in  
89 April 2020 (Methods and Table S1).<sup>21,22</sup> The care home cohort subset was selected to have a  
90 wide range of nAb titres detectable against live virus at the first sampling timepoint (T1, May  
91 2020, Fig.1). By end September 2020 (T2, five months), 32% of all participants sampled had  
92 stable or increasing nAb to live virus. In contrast, 22% had declining titres, and 38% had lost  
93 detectable nAb (Fig.1a,b).

94

95 To compare MBC frequencies in those who had maintained or lost nAb, we stained PBMC  
96 with SARS-CoV-2 spike trimer tetramers, made by pre-incubating recombinant biotinylated  
97 trimeric spike protein with fluorescently-conjugated streptavidin.<sup>15</sup> Dual staining with spike  
98 tetramers with two distinct fluorochromes was used to enhance the discrimination of true  
99 antigen-specific MBC (Fig.1c), as described previously.<sup>23-25</sup> Frequencies of antigen-specific  
100 responses were calculated within the memory fraction of B cells (CD19<sup>+</sup>CD20<sup>+</sup> excluding IgD<sup>+</sup>,  
101 CD38<sup>hi</sup> and CD21<sup>+</sup>CD27<sup>-</sup> naïve fractions, gating strategy in Fig.S1a, as previously described<sup>26</sup>).  
102 A threshold for background non-specific staining was set at mean+ 2SD of staining seen in an  
103 uninfected control cohort derived from the same care homes (seronegative at both time  
104 points, Table S1) and from pre-pandemic healthy donor samples (Fig.S1b).

105

106 Spike-specific MBC were detectable in 28 of the 32 tested 5 months post-infection (Fig.1d).  
107 The frequency of spike-specific MBC was reduced in those who had lost nAb compared to  
108 those in whom they were still detectable (Fig.1e). Of note, however, most of those (85%) who  
109 had lost detectable nAb still had some persistent spike-specific MBC, a comparable  
110 proportion to that in the group maintaining nAb (Fig.1f). The frequency of spike-specific MBC  
111 correlated significantly with the strength of the nAb response (nAb titre to live virus) at 5  
112 months (Fig.1g); however, there was partial discordance due to detection of spike-specific  
113 MBC in most individuals with no nAb (dotted box, Fig.1g).

114

115 Next, we analysed the MBC response specifically directed against RBD since this is the region  
116 within spike which many SARS-CoV-2-specific nAb target.<sup>15,27-29</sup> RBD-specific MBC were  
117 identified by gating on dual spike tetramer-staining populations that also stained with a  
118 tetramer formed from recombinant biotinylated RBD protein pre-incubated with  
119 fluorescently-conjugated streptavidin (Fig.1h). RBD-specific responses were detectable in 26  
120 of the 28 with sufficient magnitude spike-specific MBC responses (>20 dual-spike+ cells) to  
121 allow analysis of the RBD-co-staining cells (Fig.1i). The frequency of RBD-specific MBC was  
122 significantly reduced in the group who had lost nAb compared to those with stable (or waning  
123 but still detectable) nAb (Fig.1i). However, as noted with spike-specific MBC, some RBD-  
124 specific MBC remained detectable in most of the cohort, irrespective of whether or not they  
125 had lost nAb (Fig.1j). Overall, the magnitude of RBD-specific MBC correlated with nAb titres,  
126 although again there was some discordance due to RBD MBC in those who had lost nAb  
127 (dotted box in Fig.1k). Importantly, both the RBD positive and RBD negative components of  
128 the spike-specific B cell response significantly correlated with nAb titres, though slightly more  
129 robustly for the RBD positive subset (Fig.1k, Fig.S1c). This highlights the importance of the  
130 RBD as the major target for neutralising antibodies, whilst also underscoring the contribution  
131 of antibodies targeting regions outside of the RBD (for example the NTD of the spike  
132 protein<sup>15,29-31</sup>) to the neutralising antibody response, at the 5 month timepoint in this cohort.

133

134 These data therefore revealed the persistence of detectable, albeit reduced, MBC specific for  
135 both spike and RBD in most people whose nAb titres against live virus had fallen below the  
136 threshold of detection. Thus, loss of detectable nAb 5 months after asymptomatic/mild

137 infection is frequently compensated by the presence of a memory response primed to  
138 respond upon re-exposure.

139

140

141 *Comparable persistence of spike and RBD-specific MBC in elderly care home residents and*  
142 *younger staff*

143 The care home cohort was constructed to sample two comparator groups: elderly residents  
144 (median age 86yrs, range 66-96) and a control group of younger staff (median age 56yrs,  
145 range 41-65). Five months after asymptomatic/mild infection, similar proportions of staff and  
146 residents had lost detectable nAb (Fig.2a), and those who maintained them had similar titres  
147 (Fig.2b). We postulated that there may, nevertheless, be a defect in the maintenance of  
148 spike/RBD-specific MBC in the elderly compared to younger age group. However, spike-  
149 specific MBC were maintained at similar frequencies and in comparable proportions of the  
150 elderly residents and younger staff (Fig.2c,d). There were no clear trends for spike-specific  
151 MBC to decrease with increasing age, even in residents in their nineties (Fig.2e).

152

153 Similarly, RBD-specific MBC were equally well-maintained in the residents and staff (Fig.2f,g),  
154 with no decline in their frequencies (as a fraction of total MBC) with increasing age (Fig.2h).  
155 RBD-specific MBC comprised a variable proportion of the total spike-specific MBC response  
156 (4.6 to 41.0%; median 24.0%), the remainder representing B cells targeting non-RBD regions  
157 of spike. The proportions of RBD and non-RBD-binding spike-specific MBC again showed no  
158 changes with age (Fig.2i).

159

160

161 *Skewed isotype of spike/RBD-specific B cells associates with loss of neutralising antibodies*

162 Having identified and quantified antigen-specific B cells with tetramer staining, we were able  
163 to apply high-dimensional multiparameter flow cytometry to phenotype these low frequency  
164 populations without any *in vitro* manipulation. We investigated the immunoglobulin isotype,  
165 memory phenotype, homing markers and transcription factor usage of spike and RBD-specific  
166 B cells, and global B cells (Fig.3).

167

168 The vast majority of SARS-CoV-2 MBC expressed IgG, with a similar isotype distribution  
169 observed between spike and RBD-specific MBC (Fig.3a,b,c). However, individuals with  
170 persistent nAb had a higher frequency of IgG isotype expressing spike- and RBD- specific MBC  
171 than their counterparts who had lost nAb (Fig.3b,c), indicating the establishment of a robust,  
172 class-switched memory response in these individuals. In contrast, individuals whose nAb had  
173 waned below detectable limits had lost more IgG, and had a relative preservation of IgA class-  
174 switched spike- and RBD- specific MBC (Fig.3b,c). Elderly residents similarly showed a trend  
175 towards less IgG on their spike-specific MBC but, overall, no significant skewing of their  
176 immunoglobulin class-switching compared to younger staff (Fig.3b,c). Global B cells showed  
177 the same pattern of expression of different immunoglobulin isotypes on their surface in SARS-  
178 CoV-2 resolved donors as in uninfected controls, with roughly equal proportions of IgG and  
179 IgA and less than 15% IgM (Fig.S2a).

180

181 MBC subsets were examined using the combination of CD27 and CD21. The majority of spike  
182 and RBD-specific B cells had a classical resting memory phenotype (CD27<sup>+</sup>CD21<sup>+</sup>),  
183 characteristic of functional responses and comparable to the global MBC compartment, in  
184 both the elderly resident and staff groups (Fig.3d,e,f, Fig.S2b). ‘Double negative B cells’ have  
185 been associated with B cell dysfunction in ageing,<sup>32-34</sup> and the ‘DN2’ subset with an  
186 extrafollicular short-lived plasmablast response in the acute phase of a cohort with severe  
187 COVID-19.<sup>35</sup> However, at the five month timepoint following mild/asymptomatic infection in  
188 our cohort, neither the elderly nor those who had lost nAb showed any expansion of CD27<sup>-</sup>  
189 CD21<sup>-</sup> B cells (Fig.3e,f) or the DN2 subset (CD27<sup>-</sup>CD21<sup>-</sup>CXCR5<sup>lo</sup>CD11c<sup>hi</sup>, Fig.S2c). Instead, there  
190 was a selective enrichment of the activated MBC subset (CD27<sup>+</sup>CD21<sup>-</sup>, previously described  
191 to be expanded in HIV and Ebola infection or after vaccination<sup>36-38</sup>) in the RBD-binding  
192 fraction in elderly residents, with the same trend in those who had lost nAb (Fig.3g). Those  
193 who had lost nAb also had reduced expression of the B cell homing molecules CXCR3 and  
194 CXCR5 on spike-specific and global MBC (non-significant trend and significant respectively,  
195 Fig.S2d,ef). T-bet, a transcription factor critical for acute antiviral function in B cells but  
196 associated with dysfunction in chronic infections and autoimmunity,<sup>39-42</sup> also tended to be  
197 expressed at lower levels in the spike-specific MBC of those losing nAb (Fig.S2e,f).

198

199 Taken together, the isotype and memory phenotype of global and antigen-specific B cells was  
200 largely preserved in the elderly care home population, apart from an increase in spike-specific  
201 activated MBC. Individuals who maintained nAb had predominantly IgG-expressing antigen-  
202 specific MBC. In contrast, in those who had lost nAb by 5 months, whether staff or residents,  
203 residual antigen-specific B cells showed preferential preservation of IgA.

204  
205

206 *Elderly residents maintain functional spike/RBD-specific B cells but at reduced frequency*  
207 *compared to younger care home staff.*

208 Having found that antigen-specific MBC could persist following complete waning of  
209 circulating nAb, we wanted to confirm their potential for functional recall upon re-  
210 encountering SARS-CoV-2. We therefore used cultured B cell ELISpots to examine the capacity  
211 of persistent SARS-CoV-2-specific MBC to differentiate into plasmablasts capable of secreting  
212 IgG capable of binding recombinant trimeric spike, S1 or RBD proteins.

213

214 ELISpots were performed using PBMC from 24 seropositive care home residents and staff,  
215 with the threshold for detection set at the highest observed value in an uninfected controls  
216 group (five seronegative care home residents and five pre-pandemic controls). Only  
217 individuals with responses detectable in a control total IgG well were included in analysis.  
218 Where responses were too numerous to count (TNTC), the highest number of spot-forming  
219 cells (SFCs) observed in the maximal response to the respective protein was used (Fig.S3a).

220

221 Functional recall responses to SARS-CoV-2 trimeric spike protein were observed in 21 of the  
222 24 seropositive individuals tested, with ELISpots tending to be positive in more of those who  
223 had maintained nAb (Fig.4a). However, the majority of those who had lost detectable nAb  
224 still had a spike-specific response by ELISpot, with no significant difference in their magnitude  
225 compared to the nAb group (Fig.4a). ELISpots showed similar results for IgG binding S1 and  
226 RBD, with a trend to a lower proportion of positive results in those who had lost nAb but no  
227 significant difference in the magnitude of B cell recall responses in those maintaining serum  
228 nAb or not (Fig.4b,c).

229



230 The magnitude of RBD recall response assessed by ELISpot showed a significant correlation  
231 with both spike and RBD MBC detection by tetramer staining (Fig.4d,e). However, there was  
232 some discordance due to individuals who had tetramer-binding spike or RBD B cells that did  
233 not produce detectable IgG by ELISpot (dotted boxes, Fig.4d,e), mainly in those who had lost  
234 nAb. Importantly, these data revealed that circulating antigen-specific B cells can be detected  
235 in the absence of functional recall.

236

237 Next, we compared functional responses to all three proteins for each individual, ranked  
238 according to nAb status and age. Individuals with strong recall to spike (as measured by  
239 ELISpot) tended to also have strong responses to S1 and RBD, whereas others had weak  
240 responses to all three antigens (Fig.4f). Functional MBC recall responses decreased with  
241 increasing age in both the groups, regardless of maintenance of serum nAb (Fig.4f). Thus,  
242 elderly residents had significantly lower ELISpot MBC responses against spike, S1, and  
243 particularly RBD, than the younger staff group (Fig.4g,h,i). Focusing on elderly residents who  
244 had lost nAb, we found that none of these individuals sustained MBC capable of functional  
245 recall to RBD (Fig.4j).

246

247 Overall, the measurement of nAb against live virus combined with assessment of spike and  
248 RBD-specific MBC by tetramer staining and functional ELISpot provided complementary  
249 insights into B cell immunity (Fig.4k). A substantial proportion of those who had lost  
250 neutralising activity against live virus, maintained spike and RBD-specific MBC detectable  
251 with one or both assays, regardless of age. However, some of those with persistent antigen-  
252 specific MBC could not mount a detectable functional response, particularly the elderly who  
253 had lost nAb (Fig.4k).

254

## 255 Discussion

256 In this study we sampled a cohort of very elderly residents and younger staff who developed  
257 mild/asymptomatic SARS-CoV-2 infection during care home outbreaks, a high proportion of  
258 whom had lost nAb by five months. This allowed us to dissect the potential for B cell memory  
259 to persist beyond serum nAb, providing a back-up reserve to humoral immunity. We

260 demonstrated that the majority of the cohort maintained detectable frequencies of spike and  
261 RBD-specific MBC by flow cytometry, even where they had lost circulating antibodies capable  
262 of live virus neutralisation. Tetramer staining allowed accurate *ex vivo* quantification and  
263 characterisation of antigen-specific MBC, revealing that individuals who had lost nAb had  
264 lower frequencies of spike and RBD-specific MBC, with a preserved classical memory  
265 phenotype but class-switching skewed away from IgG towards IgA. Elderly and younger  
266 recovered individuals infected in the same care home outbreaks maintained similar  
267 frequencies of spike and RBD-specific tetramer-staining B cells, with comparable phenotypes  
268 and isotypes. However functional assessment using ELISpot assays demonstrated that the  
269 persisting spike, and particularly RBD-specific, MBC had reduced potential for antibody  
270 production in the elderly.

271  
272 The success of an infection or vaccine in inducing durable humoral immunity is dependent on  
273 the generation of long-lived plasma cells and MBC.<sup>17–19</sup> The longevity of the plasma cell  
274 response, capable of sustaining antibodies, varies widely following different viral infections.<sup>5–</sup>  
275 <sup>7</sup> A recent study has demonstrated the presence of bone marrow plasma cells secreting IgG  
276 against SARS-CoV-2 spike protein in fifteen of nineteen individuals examined seven months  
277 post infection,<sup>43</sup> in line with the durability of some antibodies in the first year after mild  
278 infection. Nevertheless, many studies have also highlighted the potential for neutralising  
279 antibodies to SARS-CoV-2 to wane to a point where there is an, as yet ill-defined, risk of re-  
280 infection.<sup>44–46</sup> Our study deliberately focuses on the role of MBC in those with waning or  
281 undetectable nAb to live virus, despite persistence of binding antibodies. MBC, previously  
282 identified in younger COVID-19 cohorts,<sup>11,26,47,48</sup> can provide a crucial back-up by responding  
283 quickly to pathogen re-encounter or vaccination to form new plasmablasts, producing potent  
284 affinity-matured antibodies with more flexible recognition of viral variants;<sup>9,20</sup> this is  
285 consistent with the enhanced nAb response described following vaccination of previously  
286 SARS-CoV-2 infected healthcare workers.<sup>49</sup> Our demonstration that B cells of relevant  
287 specificities can still be detected even when nAb titres are waning or completely abrogated  
288 provides some reassurance that a memory response remains intact in the elderly. Future  
289 large-scale studies are needed to assess whether B cell memory serves as an independent  
290 correlate of protection or whether reliance on MBC to mount a new response in the absence

291 of existing antibodies provides a critical window of opportunity for a virus that replicates as  
292 rapidly as SARS-CoV-2.

293

294 One strategy to combat antibodies that are waning or unable to cross-recognise emerging  
295 variants is the use of booster vaccines. Our finding that the elderly have impaired  
296 differentiation of their persistent spike/RBD-specific MBC into antibody producing cells  
297 detected by ELISpot assays provides biological rationale for a potential need for more  
298 frequent booster vaccination in this high-risk group. The frequency, phenotype and class-  
299 switching of antigen-specific B cells did not reveal obvious changes in the elderly group to  
300 account for this functional defect, other than an increase in the CD27<sup>+</sup>CD21<sup>-</sup> subset. The  
301 activated CD27<sup>+</sup>CD21<sup>-</sup> subset of MBC has recently been noted to remain expanded in some  
302 resolved COVID-19 patients,<sup>50</sup> consistent with emerging literature supporting the possibility  
303 of prolonged antigen persistence, exemplified by a recent study detecting SARS-CoV-2 in the  
304 small bowel four months after asymptomatic infection.<sup>9</sup> Our finding of more antigen-specific  
305 CD27<sup>+</sup>CD21<sup>-</sup> MBC in the older age group raises the possibility there is more prolonged antigen  
306 persistence and resultant B cell activation following SARS-CoV-2 infection in the elderly.  
307 However, the ageing immune system is characterised by a tendency to low-level chronic  
308 inflammation,<sup>51,52</sup> which could also contribute to prolonged activation of SARS-CoV-2 MBC.  
309 Analogous to our findings in elderly care home residents, both older subjects and those with  
310 HIV have been found to have persistent circulating MBC but defective plasmablast formation,  
311 resulting in reduced influenza vaccine-induced antibodies.<sup>53,54</sup> Such age-related defects in B  
312 cell responses to vaccination have been attributed to a combination of B cell intrinsic  
313 senescence and defective T follicular helper cells (Tfh) in germinal centres.<sup>55-57</sup>

314

315 A caveat to our study is that we were only able to study circulating B cells, whilst additional  
316 recall responses may be compartmentalised within the mucosa. A recent study suggested  
317 mild infection can stimulate mucosal SARS-CoV-2-specific IgA secretion in the absence of  
318 circulating antibodies.<sup>58</sup> The bias towards the retention of IgA<sup>+</sup> spike/RBD-specific MBC in  
319 those who had lost all detectable serum nAb to live virus could therefore be reflective of a  
320 stronger mucosal response in these individuals. An increase in mucosal-homing IgA responses  
321 has been described as a feature of the ageing immune response,<sup>59</sup> consistent with the older  
322 composition of our cohort. Alternatively, the relative preservation of IgA rather than IgG

323 spike/RBD-specific MBC in those with the fastest waning nAb may simply reflect the recent  
324 observations that IgA dominates the early nAb response to SARS-CoV-2 infection,<sup>56</sup> and may  
325 not decline as fast as the IgG response.<sup>9,60</sup> Since our ELISpot assays did not measure the  
326 function of IgA isotype B cells, we may have under-estimated the full extent of residual SARS-  
327 CoV-2-specific responses, particularly in those with a more IgA-skewed response. In addition,  
328 several studies have shown that the magnitude of the MBC response to SARS-CoV-2 continues  
329 to increase beyond six months,<sup>9,23,50,61</sup> again implying that we may have under-estimated the  
330 extent of recall potential in our cohort at five months. Future studies should also examine the  
331 preservation of non-spike-specific MBC with the potential to produce antibodies mediating  
332 antiviral effects beyond neutralisation, since other viral proteins (ORF3a, membrane and  
333 nucleocapsid) can play a dominant role in triggering antibody-dependent NK cell activation.<sup>62</sup>

334

335 In conclusion, by focusing on an elderly cohort with a high proportion of nAb loss, we  
336 demonstrated that this waning in the first line of humoral defence can be compensated by  
337 the presence of a reserve of adaptive B cell memory in the majority of cases. Our findings  
338 highlight the importance of including measures of B cell memory in larger studies of natural  
339 infection and vaccination to determine their role as additional correlates of protection. Our  
340 data underscore that identifying antigen-specific B cells by tetramer antigen staining is useful  
341 for quantitation and thorough *ex vivo* characterisation, but may not necessarily equate with  
342 the preservation of a functional response, as also observed in chronic viral infection.<sup>42,63</sup> The  
343 relative preservation of IgA antigen-specific MBC in those with waned serum nAb raises the  
344 possibility that mucosal sequestered immunity may outlast that detectable in the circulation.  
345 Increased expansion of activated MBC in the elderly highlights the need to investigate  
346 whether they are more prone to prolonged stimulation from persistent reservoirs of SARS-  
347 CoV-2 antigen. A finding of concern was the lack of detectable functional recall to RBD in  
348 elderly donors who had lost nAb; given that RBD is the dominant site for nAb this supports  
349 the need for additional monitoring and/or booster vaccines to maintain sufficient antibodies  
350 to neutralise emerging variants in this highly vulnerable group.

351

## 352 **Materials and Methods**

### 353 **Participants**

354 SARS-CoV-2 antigen specific memory B cell (MBC) responses were compared between elderly  
355 care home resident and younger staff counterparts exposed to the virus within the same  
356 environment. Six care homes reporting SARS-CoV-2 outbreaks to Public Health England (PHE)  
357 were recruited to longitudinal SARS-CoV-2 RT-PCR and serological follow-up in April 2020  
358 (T0).<sup>1,21</sup> Serostatus of individuals within these homes at one month and five months after the  
359 outbreaks (T1 and T2 respectively) was established using binding and functional assays as  
360 previously described.<sup>21,22</sup> Briefly, a native virus lysate assay (PHE) and/or receptor binding  
361 domain assay (RBD, PHE) determined seropositivity, and a live virus neutralising antibody  
362 assay to prototype England.2 SARS-CoV-2 virus was used to determine neutralising antibody  
363 titres.<sup>21,22</sup>

364

365 A total of 32 SARS-CoV-2 individuals (22 residents; 10 staff) were recruited, all of whom were  
366 seropositive by the binding assays described above at both sampling time points (T1: May  
367 2020, T2: September 2020), alongside 11 SARS-CoV-2 seronegative control individuals from  
368 three of the care homes. Participants donated 30ml of blood to be processed for peripheral  
369 blood mononuclear cells (PBMCs) and serum five months after the initial outbreaks (T2). The  
370 investigation protocol was reviewed and approved by the PHE Research Ethics and  
371 Governance Group (REGG Ref NR0204). Written information regarding the study was  
372 provided to all participants; verbal consent for testing was obtained by care home managers  
373 from staff members and residents or their next of kin as appropriate.

374

375 Stored pre-pandemic samples from seven healthy individuals were used as controls,  
376 recruited under ethics number 11/LO/0421 approved by the 'South East Coast - Brighton  
377 and Sussex Research Ethics Committee.

378

### 379 **Sample processing and data collection**

380 Venepuncture blood samples collected in lithium heparin coated and serum separation tubes  
381 were used for isolation of PBMC and serum respectively. PBMC were isolated by density  
382 centrifugation using Pancoll human (PAN-Biotech). Isolated PBMC were frozen in foetal

383 bovine serum (FBS) supplemented with 10% DMSO (Sigma Aldrich). Prior to use samples were  
384 thawed and washed in PBS. Serum was collected following centrifugation and stored at -80  
385 degrees prior to use.

386

387 Clinical and laboratory data including age, gender, symptom status at T0 and SARS-CoV-2 RT-  
388 PCR status at T0 were available for all participants.(Table S1)<sup>1</sup>

389

### 390 **Protein expression and purification**

391 Recombinant spike (S) and spike receptor binding domain (RBD) proteins of SARS-CoV-2 for  
392 antigen-specific B cell flow cytometry and ELISpot were expressed and purified as previously  
393 described.<sup>15</sup> Briefly, spike glycoprotein trimer (uncleaved spike stabilised in the prefusion  
394 conformation (GGGG substitution at furin cleavage site and 2P mutation)<sup>64</sup> and RBD protein<sup>12</sup>  
395 were cloned into a pHlsec vector containing Avi and 6xHis tags. Biotinylated Spike and RBD  
396 were expressed in Expi293F cells (Thermofisher Scientific). Supernatants were harvested after  
397 7 days and purified. For the production of biotinylated protein, spike and RBD encoding  
398 plasmids were co-transfected with BirA and PEI-Max in the presence of 200uM biotin.

399

400 Recombinant S1 protein constructs spanning SARS-CoV-2 residues 1-530 for ELISpot were  
401 produced as previously described.<sup>28,30</sup> Briefly, codon-optimised DNA fragments were cloned  
402 into mammalian expression vector pQ-3C-2xStrep to create plasmids, which were then  
403 transfected into Expi293F cells growing at 37 in 5% CO2 atmosphere using ExpiFectamine  
404 reagent (Thermofisher Scientific). Proteins were purified by strep-tag affinity and  
405 subsequently size exclusion chromatography.

406

### 407 **Flow cytometry**

408 High dimensional multiparameter flow cytometry was used for *ex vivo* identification of spike  
409 and RBD- specific B cells. Two panels (surface and intranuclear) of monoclonal antibodies  
410 (mAbs) were used to phenotype global and antigen specific subsets (Table S2). Biotinylated  
411 tetrameric spike (1ug) and RBD (0.5ug) were fluorochrome linked for flow cytometry by  
412 incubating with streptavidin conjugated APC (Prozyme) and PE (Prozyme) (Spike), and BV421  
413 (Biolegend) (RBD) for 30 minutes in the dark on ice.

414

415 PBMC were thawed and incubated with Live/Dead fixable dead cell stain (UV, ThermoFisher  
416 Scientific) and saturating concentrations of phenotyping mAbs (Table S2) diluted in 50%  
417 1xPBS 50% Brilliant Violet Buffer (BD Biosciences). For identification of SARS-CoV-2 antigen  
418 specific B cells 1ug per 500ul of stain each of tetrameric Spike-APC and Spike-PE and 0.5ug  
419 per 500ul stain of tetrameric RBD-BV421 were added to the cell preparation. Parallel samples  
420 stained with an identical panel of mAbs, but excluding the SARS-CoV-2 proteins (fluorescence  
421 minus one controls (FMO)) were used as controls for non-specific binding.

422  
423 Cells were incubated in the staining solution for 30 minutes at room temperature, washed  
424 with PBS, and subsequently fixed with either fixation and permeabilization solution (BD  
425 Biosciences) or FoxP3 Buffer Set (BD Biosciences) according to the manufacturer's  
426 instructions for surface and intranuclear staining respectively. Saturating concentrations of  
427 mAbs diluted in 1xPBS were added following permeabilization for the detection of  
428 intranuclear proteins. All samples were acquired on a Fortessa-X20 (BD Biosciences) and  
429 analysed using FlowJo (TreeStar).

430  
431 B cell subsets were defined as follows: MBC - CD19<sup>+</sup>CD20<sup>+</sup> excluding IgD<sup>+</sup>, CD38<sup>hi</sup> and  
432 CD21<sup>+</sup>CD27<sup>-</sup> naïve fractions, (gating strategy in Supp.Fig1a), DN2 - CD19<sup>+</sup>CD20<sup>+</sup>CD38<sup>±</sup>-CD21<sup>-</sup>  
433 CD27<sup>-</sup>CD11c<sup>hi</sup>CXCR5<sup>lo</sup>. For analysis of RBD- co-staining cells sufficient magnitude spike-specific  
434 MBC (≥20 dual-spike+ cells) were required. For phenotypic analysis of spike-specific and RBD-  
435 specific cells sufficient magnitude responses (≥50 cells in the relevant parent gate) were  
436 required.

437

#### 438 **MBC recall response to SARS-CoV-2: ELISpot**

439 To activate MBC differentiation, 1x10<sup>6</sup> PBMC were stimulated with 1ug/ml R848 (TLR7/8  
440 agonist; Resiquimod (Invivogen)) diluted in complete RPMI (cRPMI; RPMI supplemented with  
441 10% FBS plus recombinant human IL-2 (20IU/ml; Peprotech), as previously described.<sup>65,66</sup>  
442 Activated cells were incubated for six days with a media change on day three.

443

444 ELISpot plates (Mabtech) were pre-coated with recombinant SARS-CoV-2 trimeric spike  
445 (1μg/ml), S1 (1μg/ml) and RBD (10μg/ml) and anti-human IgG (1μg/ml Jackson  
446 Immunoresearch) overnight at 4°C. Coated plates were blocked with cRPMI with 10% FBS

447 prior to the addition of cells. Cultured PBMC were added at varying concentrations depending  
448 on SARS-CoV-2 antigen and incubated at 37°C at 5% CO<sub>2</sub> for 18 hours: 50,000 cells/ well to  
449 detect spike- specific IgG secreting cells; 100,000 cells/well to detect S1 and RBD IgG secreting  
450 cells; and 1000 cells/well for detection of total IgG secreting cells. To control for non-specific  
451 binding, uncoated control wells were incubated with 100,000 pre-stimulated cells. The  
452 following day, ELISpot plates were washed in filtered PBS supplemented with 0.5% Tween 20  
453 (Merck) and incubated for four hours in the dark at room temperature with 1ug/ml goat anti-  
454 human IgG horse radish peroxidase antibody (Jackson ImmunoResearch). Cells were again  
455 washed three times with PBS-Tween 20 (0.5%) and three times with PBS, then developed with  
456 3-Amino-9-ethylcarbazole (AEC) substrate (BD Biosciences) according to the manufacturer's  
457 instructions. ELISpot plates were washed with ddH<sub>2</sub>O before analysis using ViruSpot  
458 (Autoimmun Diagnostika). All conditions were performed in duplicate and responses  
459 averaged.

460

#### 461 **Data analysis and statistics**

462 Data were analysed using GraphPad Prism. Descriptive statistical analyses were performed.  
463 Continuous data that did not follow a normal distribution were described as medians with  
464 interquartile ranges and differences compared using the Mann-Whitney U test, Wilcoxon's  
465 paired *t*-test or Kruskal Wallis test with Dunn's post hoc test for pairwise multiple  
466 comparisons as appropriate. Contingency table analyses were conducted using Fisher's exact  
467 test. Correlations for non-parametric data were assessed using Spearman's rank correlation  
468 with 95% CI.

469

#### 470 **Supplementary Materials**

471 **Fig. S1. Gating strategy and threshold for detection of spike-specific responses**

472 **Fig. S2. Phenotyping of spike-specific and global MBC**

473 **Fig. S3. Representative ELISpot responses to SARS-CoV-2 proteins**

474 **Table S1. Cohort Characteristics**

475 **Table S2. Antibody list**

476



## 477 References

- 478 1. Ladhani SN, Chow JY, Janarthanan R, et al. Investigation of SARS-CoV-2 outbreaks in  
479 six care homes in London, April 2020. *EClinicalMedicine*. 2020;0(0):100533.  
480 doi:10.1016/j.eclinm.2020.100533
- 481 2. McMichael TM, Currie DW, Clark S, et al. Epidemiology of covid-19 in a long-term care  
482 facility in King County, Washington. *N Engl J Med*. 2020;382(21):2008-2011.  
483 doi:10.1056/NEJMoa2005412
- 484 3. Edridge AWD, Kaczorowska J, Hoste ACR, et al. Seasonal coronavirus protective  
485 immunity is short-lasting. *Nat Med*. 2020;26(11):1691-1693. doi:10.1038/s41591-020-  
486 1083-1
- 487 4. Siggins MK, Thwaites RS, Openshaw PJM. Durability of immunity to SARS-CoV-2 and  
488 other respiratory viruses. *Trends Microbiol*. 2021;0(0). doi:10.1016/j.tim.2021.03.016
- 489 5. Amanna IJ, Carlson NE, Slifka MK. Duration of Humoral Immunity to Common Viral  
490 and Vaccine Antigens. *N Engl J Med*. 2007;357(19):1903-1915.  
491 doi:10.1056/NEJMoa066092
- 492 6. Amanna IJ, Slifka MK. Mechanisms that determine plasma cell lifespan and the  
493 duration of humoral immunity. *Immunol Rev*. 2010;236(1):125-138.  
494 doi:10.1111/j.1600-065X.2010.00912.x
- 495 7. Hammarlund E, Thomas A, Amanna IJ, et al. Plasma cell survival in the absence of B  
496 cell memory. *Nat Commun*. 2017;8(1):1-11. doi:10.1038/s41467-017-01901-w
- 497 8. Arkhipova-Jenkins I, Helfand M, Armstrong C, et al. Antibody Response After SARS-  
498 CoV-2 Infection and Implications for Immunity. *Ann Intern Med*. Published online  
499 March 16, 2021:M20-7547. doi:10.7326/M20-7547
- 500 9. Gaebler C, Wang Z, Lorenzi JCC, et al. Evolution of antibody immunity to SARS-CoV-2.  
501 *Nature*. 2021;591(7851):639. doi:10.1038/s41586-021-03207-w
- 502 10. Harris RJ, Whitaker HJ, Andrews NJ, et al. Serological surveillance of SARS-CoV-2: Six-  
503 month trends and antibody response in a cohort of public health workers. *J Infect*.  
504 2021;11(19). doi:10.1016/j.jinf.2021.03.015
- 505 11. Hartley GE, Edwards ESJ, Aui PM, et al. Rapid generation of durable B cell memory to  
506 SARS-CoV-2 spike and nucleocapsid proteins in COVID-19 and convalescence. *Sci*  
507 *Immunol*. 2020;5(54). doi:10.1126/sciimmunol.abf8891

- 508 12. Seow J, Graham C, Merrick B, et al. Longitudinal observation and decline of  
509 neutralizing antibody responses in the three months following SARS-CoV-2 infection  
510 in humans. *Nat Microbiol.* 2020;5(12):1598-1607. doi:10.1038/s41564-020-00813-8
- 511 13. Röltgen K, Powell AE, Wirz OF, et al. Defining the features and duration of antibody  
512 responses to SARS-CoV-2 infection associated with disease severity and outcome. *Sci*  
513 *Immunol.* 2021;5(54). doi:10.1126/SCIIMMUNOL.ABE0240
- 514 14. Rees-Spear C, Muir L, Griffith SA, et al. The effect of spike mutations on SARS-CoV-2  
515 neutralization. *Cell Rep.* 2021;34(12). doi:10.1016/j.celrep.2021.108890
- 516 15. Graham C, Seow J, Huettner I, et al. Neutralization potency of monoclonal antibodies  
517 recognizing dominant and subdominant epitopes on SARS-CoV-2 Spike is impacted by  
518 the B.1.1.7 variant. *Immunity.* Published online April 1, 2021.  
519 doi:10.1016/j.immuni.2021.03.023
- 520 16. Planas D, Bruel T, Grzelak L, et al. Sensitivity of infectious SARS-CoV-2 B.1.1.7 and  
521 B.1.351 variants to neutralizing antibodies. *Nat Med.* Published online March 26,  
522 2021:1-8. doi:10.1038/s41591-021-01318-5
- 523 17. Inoue T, Moran I, Shinnakasu R, Phan TG, Kurosaki T. Generation of memory B cells  
524 and their reactivation. *Immunol Rev.* 2018;283(1):138-149. doi:10.1111/imr.12640
- 525 18. Quast I, Tarlinton D. B cell memory: understanding COVID-19. *Immunity.*  
526 2021;54:205-210. doi:10.1016/j.immuni.2021.01.014
- 527 19. Akkaya M, Kwak K, Pierce SK. B cell memory: building two walls of protection against  
528 pathogens. *Nat Rev Immunol.* 2020;20(4):229-238. doi:10.1038/s41577-019-0244-2
- 529 20. Purtha WE, Tedder TF, Johnson S, Bhattacharya D, Diamond MS. Memory B cells, but  
530 not long-lived plasma cells, possess antigen specificities for viral escape mutants. *J*  
531 *Exp Med.* 2011;208(13):2599-2606. doi:10.1084/jem.20110740
- 532 21. Ladhani SN, Jeffery-Smith A, Patel M, et al. High prevalence of SARS-CoV-2 antibodies  
533 in care homes affected by COVID-19: Prospective cohort study, England.  
534 *EClinicalMedicine.* Published online November 6, 2020:100597.  
535 doi:10.1016/j.eclinm.2020.100597
- 536 22. Jeffery-Smith A, Dun-Campbell K, Janarthanan R, et al. Infection and transmission of  
537 SARS-CoV-2 in London care homes reporting no cases or outbreaks of COVID-19:  
538 prospective observational cohort study, England 2020. *Lancet Reg Heal - Eur.*  
539 2021;3:100038. doi:10.1016/j.lanepe.2021.100038

- 540 23. Dan JM, Mateus J, Kato Y, et al. Immunological memory to SARS-CoV-2 assessed for  
541 up to 8 months after infection. *Science (80- )*. 2021;371(6529).  
542 doi:10.1126/science.abf4063
- 543 24. Amanna IJ, Slifka MK. Quantitation of rare memory B cell populations by two  
544 independent and complementary approaches. *J Immunol Methods*. 2006;317(1-  
545 2):175-185. doi:10.1016/j.jim.2006.09.005
- 546 25. Townsend SE, Goodnow CC, Cornall RJ. Single epitope multiple staining to detect  
547 ultralow frequency B cells. *J Immunol Methods*. 2001;249(1-2):137-146.  
548 doi:10.1016/S0022-1759(00)00352-5
- 549 26. Rodda LB, Netland J, Shehata L, et al. Functional SARS-CoV-2-Specific Immune  
550 Memory Persists after Mild COVID-19. *Cell*. 2021;184(1):169-183.e17.  
551 doi:10.1016/j.cell.2020.11.029
- 552 27. Liu L, Wang P, Nair MS, et al. Potent neutralizing antibodies against multiple epitopes  
553 on SARS-CoV-2 spike. *Nature*. 2020;584(7821):450-456. doi:10.1038/s41586-020-  
554 2571-7
- 555 28. Ng KW, Faulkner N, Cornish GH, et al. Preexisting and de novo humoral immunity to  
556 SARS-CoV-2 in humans. *Science (80- )*. 2020;370(6522):1339-1343.  
557 doi:10.1126/science.abe1107
- 558 29. Brouwer PJM, Caniels TG, van der Straten K, et al. Potent neutralizing antibodies from  
559 COVID-19 patients define multiple targets of vulnerability. *Science (80- )*.  
560 2020;369(6504):643-650. doi:10.1126/science.abc5902
- 561 30. Rosa A, Pye VE, Graham C, et al. SARS-CoV-2 recruits a haem metabolite to evade  
562 antibody immunity. *medRxiv Prepr Serv Heal Sci*. Published online January 26, 2021.  
563 doi:10.1101/2021.01.21.21249203
- 564 31. McCallum M, De Marco A, Lempp FA, et al. N-terminal domain antigenic mapping  
565 reveals a site of vulnerability for SARS-CoV-2. *Cell*. 2021;184(9):2332-2347.e16.  
566 doi:10.1016/j.cell.2021.03.028
- 567 32. Ma S, Wang C, Mao X, Hao Y. B Cell Dysfunction Associated With Aging and  
568 Autoimmune Diseases. *Front Immunol*. 2019;10(FEB):318.  
569 doi:10.3389/fimmu.2019.00318
- 570 33. Phalke S, Marrack P. Age (autoimmunity) associated B cells (ABCs) and their relatives.  
571 *Curr Opin Immunol*. 2018;55:75-80. doi:10.1016/j.coi.2018.09.007

- 572 34. Jenks SA, Cashman KS, Zumaquero E, et al. Distinct Effector B Cells Induced by  
573 Unregulated Toll-like Receptor 7 Contribute to Pathogenic Responses in Systemic  
574 Lupus Erythematosus. *Immunity*. 2018;49(4):725-739.e6.  
575 doi:10.1016/j.immuni.2018.08.015
- 576 35. Woodruff MC, Ramonell RP, Nguyen DC, et al. Extrafollicular B cell responses  
577 correlate with neutralizing antibodies and morbidity in COVID-19. *Nat Immunol*.  
578 2020;21(12):1506-1516. doi:10.1038/s41590-020-00814-z
- 579 36. Moir S, Buckner CM, Ho J, et al. B cells in early and chronic HIV infection: Evidence for  
580 preservation of immune function associated with early initiation of antiretroviral  
581 therapy. *Blood*. 2010;116(25):5571-5579. doi:10.1182/blood-2010-05-285528
- 582 37. Davis CW, Jackson KJL, Mcelroy AK, Glass PJ, Boyd SD, Correspondence RA.  
583 Longitudinal Analysis of the Human B Cell Response to Ebola Virus Infection In Brief.  
584 *Cell*. 2019;177. doi:10.1016/j.cell.2019.04.036
- 585 38. Lau D, Lan LYL, Andrews SF, et al. Low CD21 expression defines a population of recent  
586 germinal center graduates primed for plasma cell differentiation. *Sci Immunol*.  
587 2017;2(7). doi:10.1126/sciimmunol.aai8153
- 588 39. Knox JJ, Kaplan DE, Betts MR. T-bet-expressing B cells during HIV and HCV infections.  
589 *Cell Immunol*. 2017;321:26-34. doi:10.1016/j.cellimm.2017.04.012
- 590 40. Knox JJ, Buggert M, Kardava L, et al. T-bet+ B cells are induced by human viral  
591 infections and dominate the HIV gp140 response. *JCI Insight*. 2017;2(8).  
592 doi:10.1172/jci.insight.92943
- 593 41. Barnett BE, Staupe RP, Odorizzi PM, et al. Cutting Edge: B Cell–Intrinsic T-bet  
594 Expression Is Required To Control Chronic Viral Infection. *J Immunol*.  
595 2016;197(4):1017-1022. doi:10.4049/jimmunol.1500368
- 596 42. Burton AR, Pallett LJ, McCoy LE, et al. Circulating and intrahepatic antiviral B cells are  
597 defective in hepatitis B. *J Clin Invest*. 2018;128(10):4588-4603. doi:10.1172/JCI121960
- 598 43. Turner JS, Kim W, Kalaidina E, et al. SARS-CoV-2 infection induces long-lived bone  
599 marrow plasma cells in humans. *Nature*. doi:10.1038/s41586-021
- 600 44. Lumley SF, O'Donnell D, Stoesser NE, et al. Antibody Status and Incidence of SARS-  
601 CoV-2 Infection in Health Care Workers. *N Engl J Med*. Published online December 23,  
602 2020. doi:10.1056/nejmoa2034545
- 603 45. Overbaugh J. Understanding protection from SARS-CoV-2 by studying reinfection. *Nat*

- 604 *Med.* 2020;26(11):1680-1681. doi:10.1038/s41591-020-1121-z
- 605 46. Hall V, Foulkes S, Charlett A1, Atti A1, Monk EJM1, Simmons R1, Wellington E1, Cole 8  
606 MJ1, Saei A1, Oguti B1, Munro K1, Wallace S1, Kirwan PD1, Shrotri M1, Vusirikala A1,  
607 9 Rokadiya S1, Kall M1, Zambon M1, Ramsay M1, Brooks T1, SIREN Study Group,  
608 Brown CS & HS. Do antibody positive healthcare workers have lower SARS-CoV-2  
609 infection rates than antibody negative healthcare workers? Large multi-centre  
610 prospective cohort study (the SIREN study), England: June to November 2020.  
611 *medRxiv*. Published online January 15, 2021:2021.01.13.21249642.  
612 doi:10.1101/2021.01.13.21249642
- 613 47. Juno JA, Tan HX, Lee WS, et al. Humoral and circulating follicular helper T cell  
614 responses in recovered patients with COVID-19. *Nat Med*. Published online July 13,  
615 2020:1-7. doi:10.1038/s41591-020-0995-0
- 616 48. Ogega CO, Skinner NE, Blair PW, et al. Durable SARS-CoV-2 B cell immunity after mild  
617 or severe disease. *J Clin Invest*. Published online February 11, 2021.  
618 doi:10.1172/jci145516
- 619 49. Reynolds CJ, Pade C, Gibbons JM, et al. Prior SARS-CoV-2 infection rescues B and T  
620 cell responses to variants after first vaccine dose. *Science*. Published online April 30,  
621 2021. doi:10.1126/science.abh1282
- 622 50. Sokal A, Chappert P, Barba-Spaeth G, et al. Maturation and persistence of the anti-  
623 SARS-CoV-2 memory B cell response. *Cell*. 2021;184(5):1201-1213.e14.  
624 doi:10.1016/j.cell.2021.01.050
- 625 51. Mueller AL, Mcnamara MS, Sinclair DA. Why does COVID-19 disproportionately affect  
626 older people? *Aging (Albany NY)*. 2020;12(10):9959-9981. doi:10.18632/aging.103344
- 627 52. Franceschi C, Bonafè M, Valensin S, et al. Inflamm-aging. An evolutionary perspective  
628 on immunosenescence. In: *Annals of the New York Academy of Sciences*. Vol 908.  
629 New York Academy of Sciences; 2000:244-254. doi:10.1111/j.1749-  
630 6632.2000.tb06651.x
- 631 53. Frasca D, Diaz A, Romero M, Blomberg BB. The generation of memory B cells is  
632 maintained, but the antibody response is not, in the elderly after repeated influenza  
633 immunizations. *Vaccine*. 2016;34(25):2834-2840. doi:10.1016/j.vaccine.2016.04.023
- 634 54. Rinaldi S, Zangari P, Cotugno N, et al. Antibody but not memory B-cell responses are  
635 tuned-down in vertically HIV-1 infected children and young individuals being

- 636 vaccinated yearly against influenza. *Vaccine*. 2014;32(6):657-663.  
637 doi:10.1016/j.vaccine.2013.12.008
- 638 55. Frasca D, Blomberg BB, Garcia D, Keilich SR, Haynes L. Age-related factors that affect  
639 B cell responses to vaccination in mice and humans. *Immunol Rev*. 2020;296(1):142-  
640 154. doi:10.1111/imr.12864
- 641 56. Linterman MA. How T follicular helper cells and the germinal centre response change  
642 with age. *Immunol Cell Biol*. 2014;92(1):72-79. doi:10.1038/icb.2013.77
- 643 57. Silva-Cayetano A, Foster WS, Innocentin S, et al. A booster dose enhances  
644 immunogenicity of the COVID-19 vaccine candidate ChAdOx1 nCoV-19 in aged mice.  
645 *Med*. 2021;2(3):243-262.e8. doi:10.1016/j.medj.2020.12.006
- 646 58. Cervia C, Nilsson J, Zurbuchen Y, et al. Systemic and mucosal antibody responses  
647 specific to SARS-CoV-2 during mild versus severe COVID-19. *J Allergy Clin Immunol*.  
648 2021;147(2):545-557.e9. doi:10.1016/j.jaci.2020.10.040
- 649 59. Arranz E, O'Mahony S, Barton JR, Ferguson A. Immunosenescence and mucosal  
650 immunity: Significant effects of old age on secretory IgA concentrations and  
651 intraepithelial lymphocyte counts. *Gut*. 1992;33(7):882-886.  
652 doi:10.1136/gut.33.7.882
- 653 60. Sterlin D, Mathian A, Miyara M, et al. IgA dominates the early neutralizing antibody  
654 response to SARS-CoV-2. *Sci Transl Med*. 2021;13(577):2223.  
655 doi:10.1126/scitranslmed.abd2223
- 656 61. Sherina N, Piralla A, Du L, et al. Persistence of SARS-CoV-2 specific B- and T-cell  
657 responses in convalescent COVID-19 patients 6-8 months after the infection. *Med*.  
658 2021;2(3):281-295.e4. doi:10.1016/j.medj.2021.02.001
- 659 62. Fielding CA1, Sabberwal P1, Williamson JC2, Greenwood EJD2, Crozier TWM2, Zelek  
660 W1, Seow J3, Graham C3, Huettner I3, Edgeworth JD3,4, Morgan BP1, Ladell K1, Eberl  
661 M1, Humphreys IR1, Merrick B3,4, Doores K3, Wilson SJ5, Lehner PJ2, Wang ECY1 SR.  
662 ADNKA overcomes SARS-CoV2-mediated NK cell inhibition through non-spike  
663 antibodies. *bioRxiv*. Published online April 6, 2021:2021.04.06.438630.  
664 doi:10.1101/2021.04.06.438630
- 665 63. Salimzadeh L, Bert N Le, Dutertre C-A, et al. PD-1 blockade partially recovers  
666 dysfunctional virus-specific B cells in chronic hepatitis B infection. *J Clin Invest*.  
667 2018;128(10):4573-4587. doi:10.1172/JCI121957

- 668 64. Wrapp D, Wang N, Corbett KS, et al. *Cryo-EM Structure of the 2019-NCov Spike in the*  
669 *Prefusion Conformation.*; 2019. Accessed May 25, 2021. <https://www.gisaid>.
- 670 65. Jahnmatz M, Kesa G, Netterlid E, Buisman AM, Thorstensson R, Ahlborg N.  
671 Optimization of a human IgG B-cell ELISpot assay for the analysis of vaccine-induced  
672 B-cell responses. *J Immunol Methods*. 2013;391(1-2):50-59.  
673 doi:10.1016/j.jim.2013.02.009
- 674 66. Crotty S, Aubert RD, Glidewell J, Ahmed R. Tracking human antigen-specific memory B  
675 cells: A sensitive and generalized ELISPOT system. *J Immunol Methods*. 2004;286(1-  
676 2):111-122. doi:10.1016/j.jim.2003.12.015

677

## 678 Acknowledgements

679

680 The authors are very grateful to the care home managers, staff and residents; without their  
681 support and engagement this investigation would not have been possible. The authors would  
682 also like to thank the staff in the Immunisation and Countermeasures Department, in  
683 particular Maria Zavala, the Virus Reference Department, PHE Operations, the London  
684 Coronavirus Response Cell, in particular Nalini Iyengar and Jonathan Fok, PHE Field services,  
685 and the Maini laboratory for their help coordinating this investigation. We thank Peter  
686 Cherepanov of the Francis Crick Institute for supplying recombinant S1 antigen.

687

## 688 Funding

689

690 This work was supported by Public Health England, and by a Medical College of St  
691 Bartholomew's Hospital Trustees Clinical Research Fellowship (to AJS), and NIHR EME, EU  
692 Horizon 2020 and UKRI/NIHR UK-CIC grants (to MKM). LEM is supported by a Medical  
693 Research Council Career Development Award (MR/R008698/1). Additional support was  
694 provided by the UCL Coronavirus Response Fund made possible through generous donations  
695 from UCL's supporters, alumni and friends (LEM). KJD is supported by the King's Together  
696 Rapid COVID-19 Call.

697

698 **Author contributions**

699 Conceptualization: AJS, MZ, LEM, MKM; Methodology: AJS, ARB, LM, KJD, SNL, LEM, MKM;

700 Investigation: AJS, ARB, SL, MP, RG, CRS, LEM; Sample and clinical data acquisition: AJS, FA,

701 SNL, JYC; Analysis: AJS, ARB, SL, MP, RG, LEM, MKM; Funding acquisition: SNL, JYC, MZ, MKM;

702 Supervision: SNL, MZ, LEM, MKM; Writing – original draft: AJS, MKM; Writing – review &

703 editing: All authors

704

705 **Competing interests**

706 None declared

707

708

709

710

711

712

713

714

715

716

717

718

719

720

721

722

723

724

725

726

727



728 **Figures**

729 **Figure 1.**

730

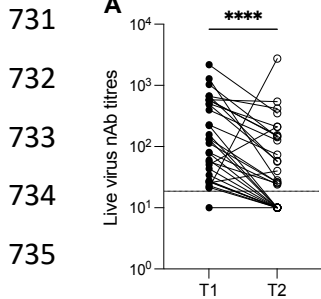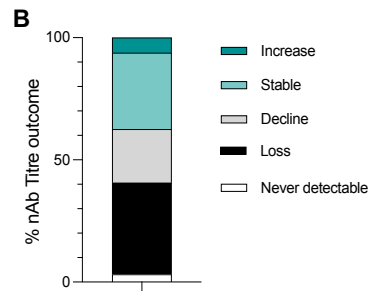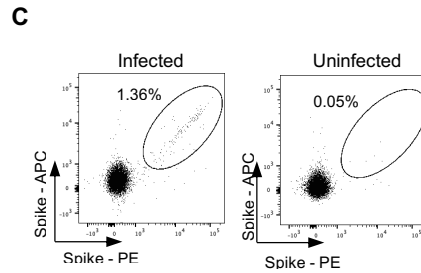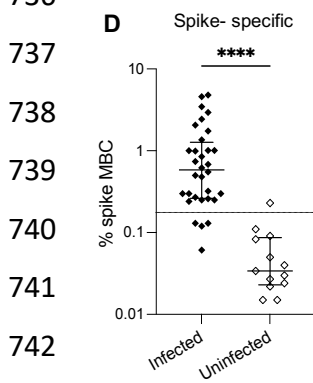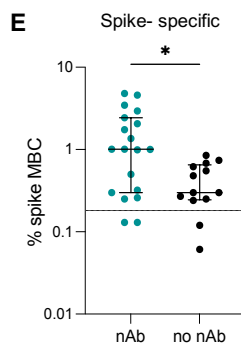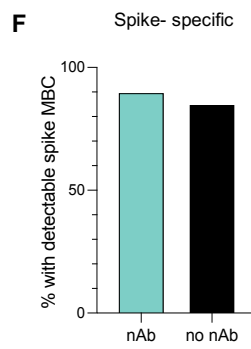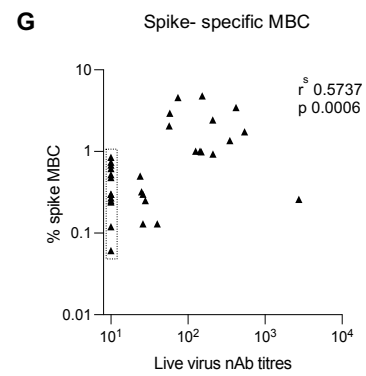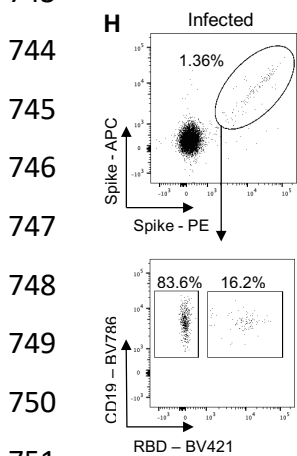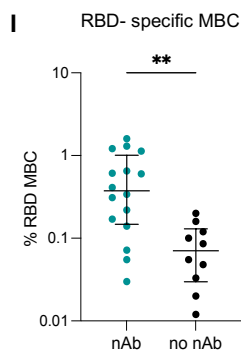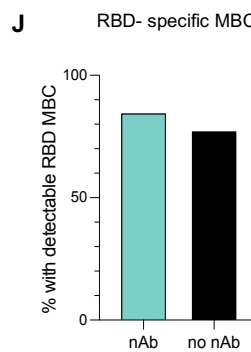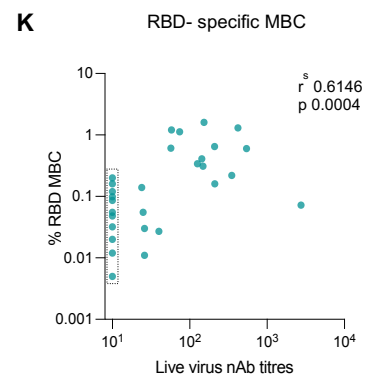

770 **Spike and RBD-specific memory B cells persist five months post-SARS-CoV-2 infection**  
771 **despite waning neutralising antibodies**

772 **(A)** Paired live virus nAb titres (nAb) at T1 and T2 of individuals infected prior to T1 (n=32).

773 **(B)** Proportion of infected individuals with change in nAb indicated between T1 and T2:

774 increase =  $\geq 4$  fold rise in nAb; static =  $> 4$  fold decrease  $< 4$  fold increase; decline  $\geq 4$  fold

775 decrease; loss = no detectable nAb titres at T2 from detectable nAb at T1; never detectable

776 = absence of nAb titres at T1 and T2 (n=32). **(C)** Representative FACS plots of dual staining

759 with SARS-CoV-2 spike tetramers on MBC (CD3-CD14-CD19+CD20+CD38(+/-) IgD- excluding  
760 naïve (CD21+CD27-)) for previously infected (left) and uninfected (right) individuals. **(D, E)**  
761 Frequency of dual spike-specific MBC **(D)** in infected (n=32) and uninfected (n=13) and **(E)** in  
762 infected individuals with (nAb, n=19) and without (no nAb, n=13) detectable nAb at T2.  
763 Dashed lines indicate threshold for spike-specific responses determined by uninfected  
764 controls (Supplementary figure 1b). **(F)** Proportion of infected individuals with detectable  
765 spike-MBC above the threshold stratified by presence (nAb, n=19) and absence (no nAb,  
766 n=13) of detectable nAb at T2. **(G)** Correlation between frequency of spike MBC and live  
767 virus nAb titres in infected individuals (n=32). **(H)** Representative FACS plots of dual staining  
768 with SARS-CoV-2 spike tetramers on MBC (top panel) and RBD tetramer on dual spike  
769 specific cells (lower panel) of an infected individual. Minimum number of cells in spike-  
770 specific gate required for RBD probe analysis = 20 **(I)** Frequency of RBD- specific MBC in  
771 infected individuals with detectable spike-specific responses stratified by presence (nAb,  
772 n=16) and absence (no nAb, n=10) detectable nAb at T2. **(J)** Proportion of infected  
773 individuals with detectable RBD MBC stratified by presence (nAb, n=16) and absence (no  
774 nAb, n=10) of detectable nAb at T2. **(K)** Correlation between frequency of RBD MBC and live  
775 virus nAb titres in all infected individuals (n=29). **(A)** Wilcoxon matched pairs,  $p \leq 0.0001$ . **(D,**  
776 **E, I)** Bars indicate median and interquartile range; Mann Whitney U Test; **(D)**  $p \leq 0.0001$ , **(E)**  
777  $p=0.0114$ , **(I)**  $p=0.0012$ . **(F, J)** Fisher's exact test ; **(F)**  $p= 0.6285$ , **(J)**  $p= 0.6664$ . **(G, K)** Dotted  
778 box indicates individuals with discordant MBC and nAb response. Spearman's rank  
779 correlation. nAb, neutralising antibody; MBC, memory B cell, RBD, receptor binding domain.  
780 Analysis of RBD specific MBC only in those with  $\geq 20$  cells in spike-specific gate.

781

782

783

784

785

786

787

788

789

790

791 **Figure 2.**

792

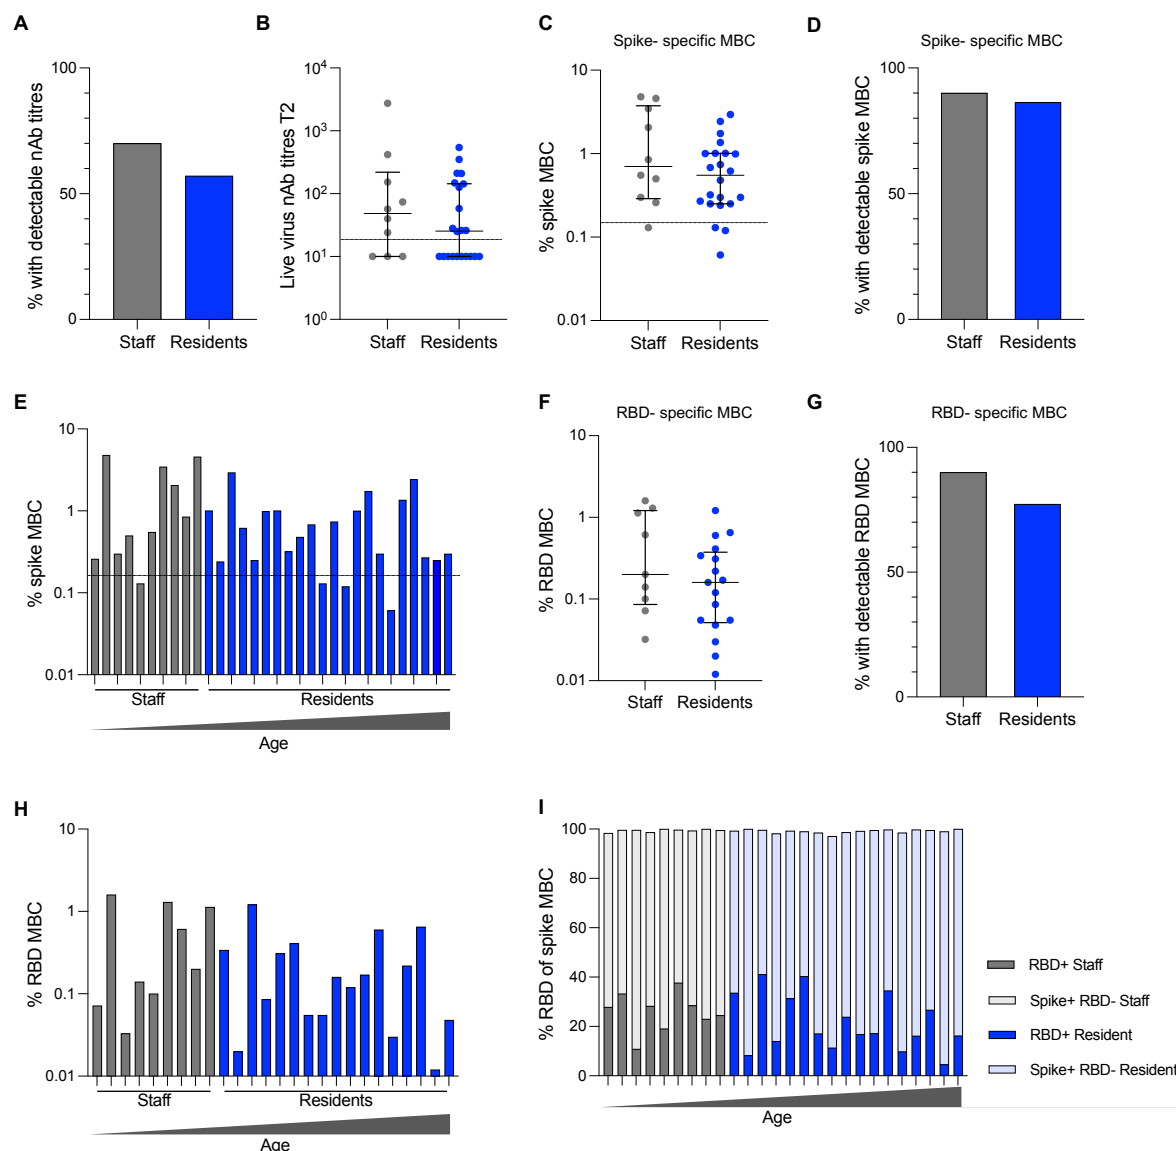

793

794 **Comparable persistence of spike and RBD-specific memory B cells in elderly care home**  
 795 **residents and younger staff**

796 **(A)** Proportion of staff (n= 10) and residents (n=21) with detectable nAb at T1 who  
 797 continued to have detectable nAb at T2. **(B)** nAb titres at T2 for all infected individuals  
 798 stratified by staff (n=10) and residents (n=22). Dashed line indicates assay threshold for  
 799 detection, undetectable titres assigned a value of 10. **(C)** Frequency of dual spike-specific  
 800 MBC in staff (n=10) and residents (n=22). **(D)** Proportion of infected individuals with  
 801 detectable spike-MBC stratified by staff (n=10) and resident (n=22) status. **(E)** Frequency of  
 802 dual spike-specific MBC for staff (grey) and residents (blue) ordered by age from youngest

803 on the left to oldest on the right. **(F)** Frequency of RBD- specific MBC in staff (n=9) and  
804 residents (n=17) with detectable spike specific responses. **(G)** Proportion of infected  
805 individuals with detectable RBD MBC stratified by staff (n=10) and resident (n=22) status.  
806 **(H)** Frequency of RBD-specific MBC for staff (grey) and residents (blue) ordered by age from  
807 youngest on the left to oldest on the right. **(I)** Proportion of dual spike specific cells with  
808 specificity for RBD (staff= dark grey; residents = dark blue), or non-RBD region (staff = pale  
809 grey; residents = pale blue) in staff (n=9) and residents (n=17). **(A, D, G)** Fisher's exact test;  
810 **(A)**  $p > 0.9999$ , **(D)**  $p > 0.9999$ , **(G)**  $p = 0.6367$ . **(B, C, F)** Bars indicate median and interquartile  
811 range; Mann Whitney U test; **(B)**  $p = 0.4367$ , **(C)**  $p = 0.2552$ , **(F)**  $p = 0.2359$ . **(C, E)** Dashed line  
812 indicates threshold for spike-specific responses determined by uninfected controls  
813 (Supplementary figure 1b).

814

815

816

817

818

819

820

821

822

823

824

825

826

827

828

829

830

831

832

833

834

835 **Figure 3.**

836

837 **A**

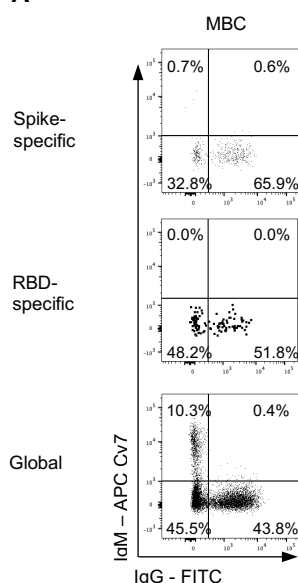

837 **B**

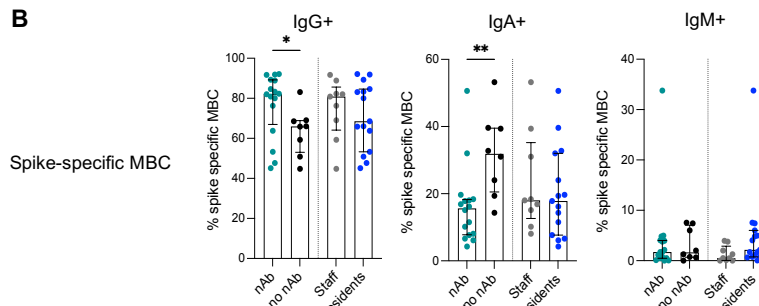

837 **C**

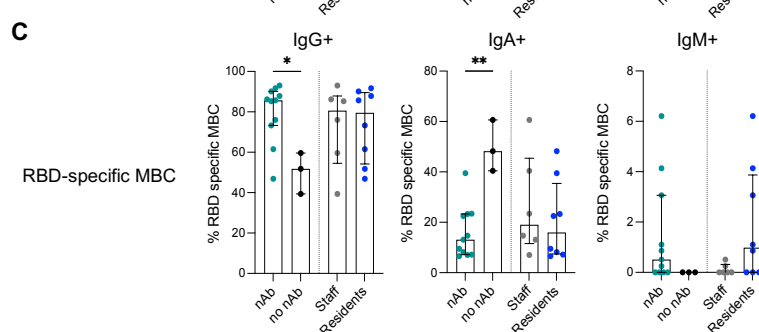

848 **D**

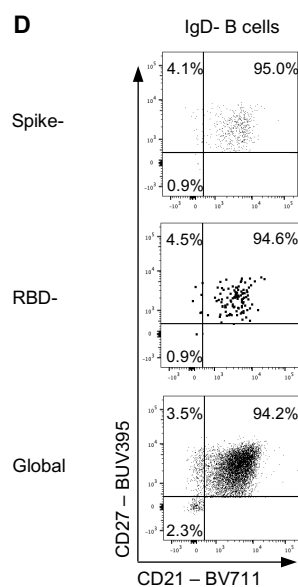

848 **E**

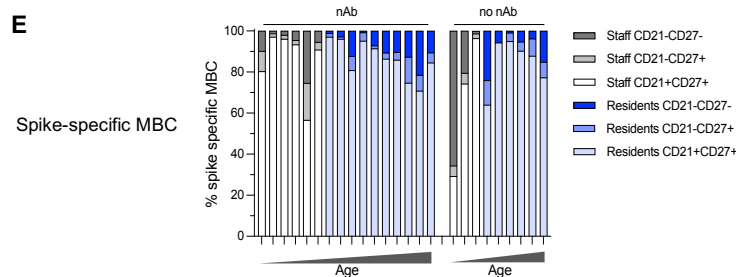

848 **F**

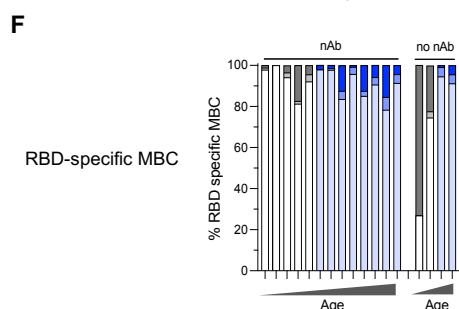

848 **G**

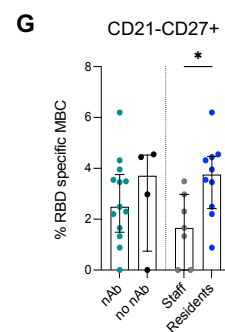

859 **Preserved memory phenotype but skewed isotype of spike/RBD-specific B cells with loss**  
 860 **of neutralising antibodies**

861 (A) Representative FACS plots of IgM and IgG on spike-specific (top panel), RBD-specific  
 862 (middle panel), and global (bottom panel) CD19+CD20+CD38lo/neg IgD- MBC from an  
 863 infected individual. (B) Frequency of IgG+, IgA+ (denoted by IgD-, IgG-, IgM-) and IgM+ spike-  
 864 specific MBC stratified by presence (nAb, n=16) and absence (no nAb, n=8) of detectable  
 865 nAb at T2, and by staff (grey, n=9) and resident (blue, n=15) status. (C) Frequency of IgG+,  
 866 IgA+ (denoted by IgD-, IgG-, IgM-) and IgM+ RBD-specific MBC stratified by stratified by

867 presence (nAb, n=11) and absence (no nAb, n=3) of detectable nAb at T2, and by staff (grey,  
868 n=6) and resident (blue, n=8) status. **(D)** Representative FACS plots of CD21 and CD27 gating  
869 on spike-specific (top panel), RBD- specific (middle panel), and global (bottom panel)  
870 CD19+CD20+CD38lo/neg IgD-MBC from an infected individual. **(E)** Frequency of CD21-  
871 CD27+, CD21+CD27+ and CD21-CD27- MBC subsets of spike- specific MBC stratified by  
872 presence (nAb, n=16) and absence (no nAb, n=9) of detectable nAb at T2 ordered by  
873 increasing age. **(F)** Frequency of CD21-CD27+, CD21+CD27+ and CD21-CD27- MBC subsets of  
874 RBD- specific MBC stratified by presence (nAb, n=13) and absence (no nAb, n=4) of  
875 detectable nAb at T2 ordered by increasing age. **(G)** Frequency of CD21-CD27+ RBD- specific  
876 MBC stratified by presence (nAb, n=13) and absence (no nAb, n=4) of detectable nAb at T2,  
877 and by staff (grey, n=7) and resident (blue, n=10) status. **(B, C, G)** Bars indicate median and  
878 interquartile range; Mann Whitney U test; **(B)** IgG p=0.0382; ns, IgA p=0.0045; ns, IgM ns;  
879 ns; **(C)** IgG p=0.0220; ns, IgA p=0.0055; ns, IgM ns; ns; **(G)** ns; 0.0180.

880 Analysis of individuals  $\geq 50$  cells in the relevant parent gate for all phenotypic analysis.

881

882

883

884

885

886

887

888

889

890

891

892

893

894

895

896

897

898

899 **Figure 4.**

900

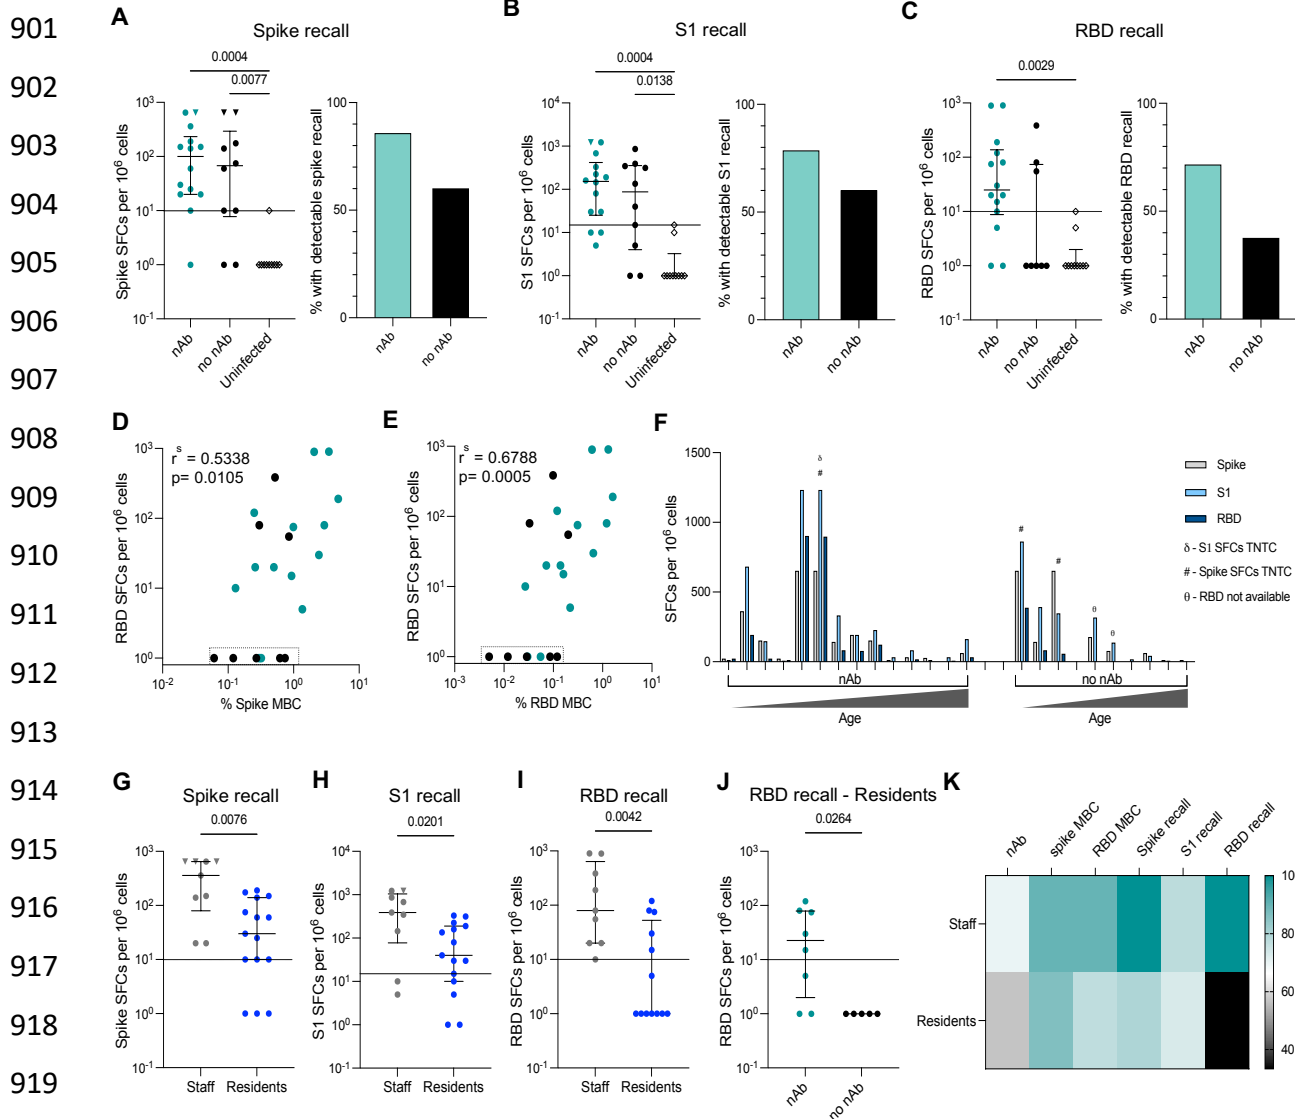

921 **Elderly maintain some functional spike/RBD-specific B cells at reduced frequency**

922 **compared to younger care home staff**

923 (A, B, C) Left panels: SFCs per 1 million PBMC for infected individuals stratified by presence  
 924 (nAb) and absence (no nAb) of detectable nAb at T2 and for uninfected controls. Right

925 panel: proportion of infected individuals stratified by presence (nAb) and absence (no nAb)

926 of detectable nAb at T2 with detectable recall responses. (A) Spike protein (nAb n=14, no

927 nAb n=10, uninfected n=10), (B) S1 protein (nAb n=14, no nAb n=10, uninfected n=10), (C)

928 RBD protein (nAb n=14, no nAb n=8, uninfected n=10). (D, E) Correlation between SFCs per

929 10<sup>6</sup> PBMC to SARS-CoV-2 RBD protein and (D) frequency of spike specific MBC, (E) frequency

930 of RBD positive MBC for those with nAb (green) and without nAb (black). (F) SFCs per 1

931 million PBMC to Spike (grey), S1 (pale blue), and RBD (dark blue) per individual stratified by  
932 presence (nAb, n=14) and absence (no nAb, n=10) of detectable nAb at T2 ordered by  
933 increasing age. **(G, H, I)** SFCs per 1 million PBMC for infected individuals stratified by staff  
934 and resident status, **(G)** Spike protein (staff n=9, resident n=15), **(H)** S1 protein (staff n=9,  
935 resident n=15, **(I)** RBD protein (staff n=9, resident n=13). **(J)** SFCs per 1 million PBMC to RBD  
936 protein for infected residents stratified by presence (nAb, n=8) and absence (no nAb, n=5) of  
937 detectable nAb at T2. **(K)** Summary heatmap of proportion of staff and residents with nAb  
938 titres detectable at T2, spike- and RBD- specific MBC by flow cytometry, and spike, S1 and  
939 RBD recall by ELISpot. **(A, B, C)** Left panels: Bars indicated median and interquartile range,  
940 dashed line indicates threshold indicated by seronegative and pre-pandemic controls.  
941 Kruskal Wallis multiple comparison ANOVA with Dunn's correction, significance as indicated.  
942 **(A, B, C)** Right panels: Fisher's exact test **(A)** p= 0.3413, **(B)** p= 0.3926, **(C)** p= 0.1870. **(D, E)**  
943 Dotted box indicates individuals with discordant MBC and ELISpot response. Spearman's  
944 rank correlation. **(G, H, I, J)** Bars indicated median and interquartile range, dashed line  
945 indicates threshold indicated by seronegative and pre-pandemic controls. Mann Whitney U  
946 Test, significance as indicated.  
947 **(A, B, G, H)** Inverted triangle: individuals where the responses were TNTC, these individuals  
948 have been assigned the maximal response observed. **(F)**  $\delta$ : SFCs TNTC in response to S1; #:  
949 SFCs were too numerous to count in response to Spike. For these individuals values have  
950 been assigned the maximum response observed on the plate for analyses.  $\theta$ : RBD counts  
951 unavailable.  
952 Individuals with a zero response to any antigen have been assigned a value of 1 to allow  
953 plots to be drawn on a logarithmic scale. All statistical analysis performed using original  
954 values. SFC, spot forming cells; RBD, Receptor binding domain; MBC, memory B cells, TNTC,  
955 too numerous to count.  
956  
957
